# Supplementary material
Source: PubMed Central journal article supplement (PMC3191856)
Supplement: NIHMS36572-supplement-01.pdf [file NIHMS36572-supplement-01.pdf]

- Room to roam? The threat to khulan (Wild Ass) from human intrusion. Mongolia Discussion Papers, East Asia and Pacific Environment and Social Development Departure. Washington, D.C., World Bank.
38. Kaczensky, P., Enkhsaikhan, N., Ganbaatar, O. & Walzer, C. 2008a. The Great Gobi B Strictly Protected Area in Mongolia - refuge or sink for wolves *Canis lupus* in the Gobi? *Wildlife Biology* **14**: 444-456.  
DOI:10.2981/0909-6396-14.4.444
  39. Kaczensky, P., Ganbaatar, O., von Wehrden, H. & Walzer, C. 2008b. Resource selection by sympatric wild equids in the Mongolian Gobi. *Journal of Applied Ecology* **45**: 1762–1769.  
DOI:10.1111/j.1365-2664.2008.01565.x
  40. Kaczensky, P., Kuehn, R., Lhagvasuren, B., Pietsch, S., Yang, W. & Walzer, C. *In press* 2011. Connectivity of the Asiatic wild ass population in the Mongolian Gobi. *Biological Conservation*.  
DOI:10.1016/j.biocon.2010.12.013
  41. Microwave Telemetry, Inc. 2005. Argos performance in Europe part I. *Tracker News*, Winter 2005. Available via [http://www.microwavetelemetry.com/newsletters/winter\\_05page8.pdf](http://www.microwavetelemetry.com/newsletters/winter_05page8.pdf) cited March 2010 cited January 2011
  42. ● Gros, P., J.P. Malarde & B. Woodward. 2006. Argos performance in Europe part II. *Microwave Telemetry Inc., Tracker News*, Spring 2006. Available via [http://microwavetelemetry.com/newsletters/spring\\_06page8.pdf](http://microwavetelemetry.com/newsletters/spring_06page8.pdf) cited March 2010
  43. Soutullo, A., Cadahia, L., Urios, V., Ferrer, M. & Negro, J.J. 2007. Accuracy of lightweight satellite telemetry: a case study in the Iberian Peninsula. *Journal of Wildlife Management* **71**: 1010-1015.  
DOI:10.2193/2006-042
  44. McCarthy, T. 2006. Snow Leopard Update from Dr. Tom McCarthy: Radio noise hampers satellite-based study of snow leopards in Asia. *Asia-Pacific Regional Space Agency Forum (APRSAP) feature*. Available via [http://www.aprsaf.org/interviews\\_features/features\\_2007/feature\\_19.php](http://www.aprsaf.org/interviews_features/features_2007/feature_19.php) cited January 2011
  45. Microwave 2007. Updates. *Tracker News*, Winter 2007. Available via <http://www.microwavetelemetry.com/newsletters/winter07page6.pdf> cited March 2010
  46. Krausman, P.R., Bleich, F.C., Cain, J.W., Stephenson, T.R., DeYoung, D.W., McGrath, P.W., Swift, P.K., Pierce, B.M. & Jansen, B.D. 2004. From the Field: Neck lesions in ungulates from collars incorporating satellite technology. *Wildlife Society Bulletin* **32**: 987-991.  
DOI:10.2193/0091-7648(2004)032[0987:FTFNLI]2.0.CO;2
  47. ● Zweifel-Schielly, B. & Suter, W. 2007. Performance of GPS telemetry collars for red deer *Cervus elaphus* in rugged Alpine terrain under controlled and free-living conditions. *Wildlife Biology* **13**: 299-312.  
DOI:10.2981/0909-6396(2007)13[299:POGTCF]2.0.CO;2

### Supporting Information

*Appendix I*: List of all 104 individual collars and their evaluation.
